# Supplementary material for: Gut microbiota mediate the protective effects on endometritis induced by Staphylococcus aureus in mice
Source: Royal Society of Chemistry journal article supplement (doi:10.1039/c9fo02963j), 2020-01-01
Supplement: c9fo02963j2.pdf [file c9fo02963j2.pdf]

Supplementary figure. 1. Species accumulation boxplot
