# Supplementary figures and images for: Gut microbiota mediate the protective effects on endometritis induced by Staphylococcus aureus in mice
Source: Royal Society of Chemistry journal article supplement (doi:10.1039/c9fo02963j), 2020-01-01

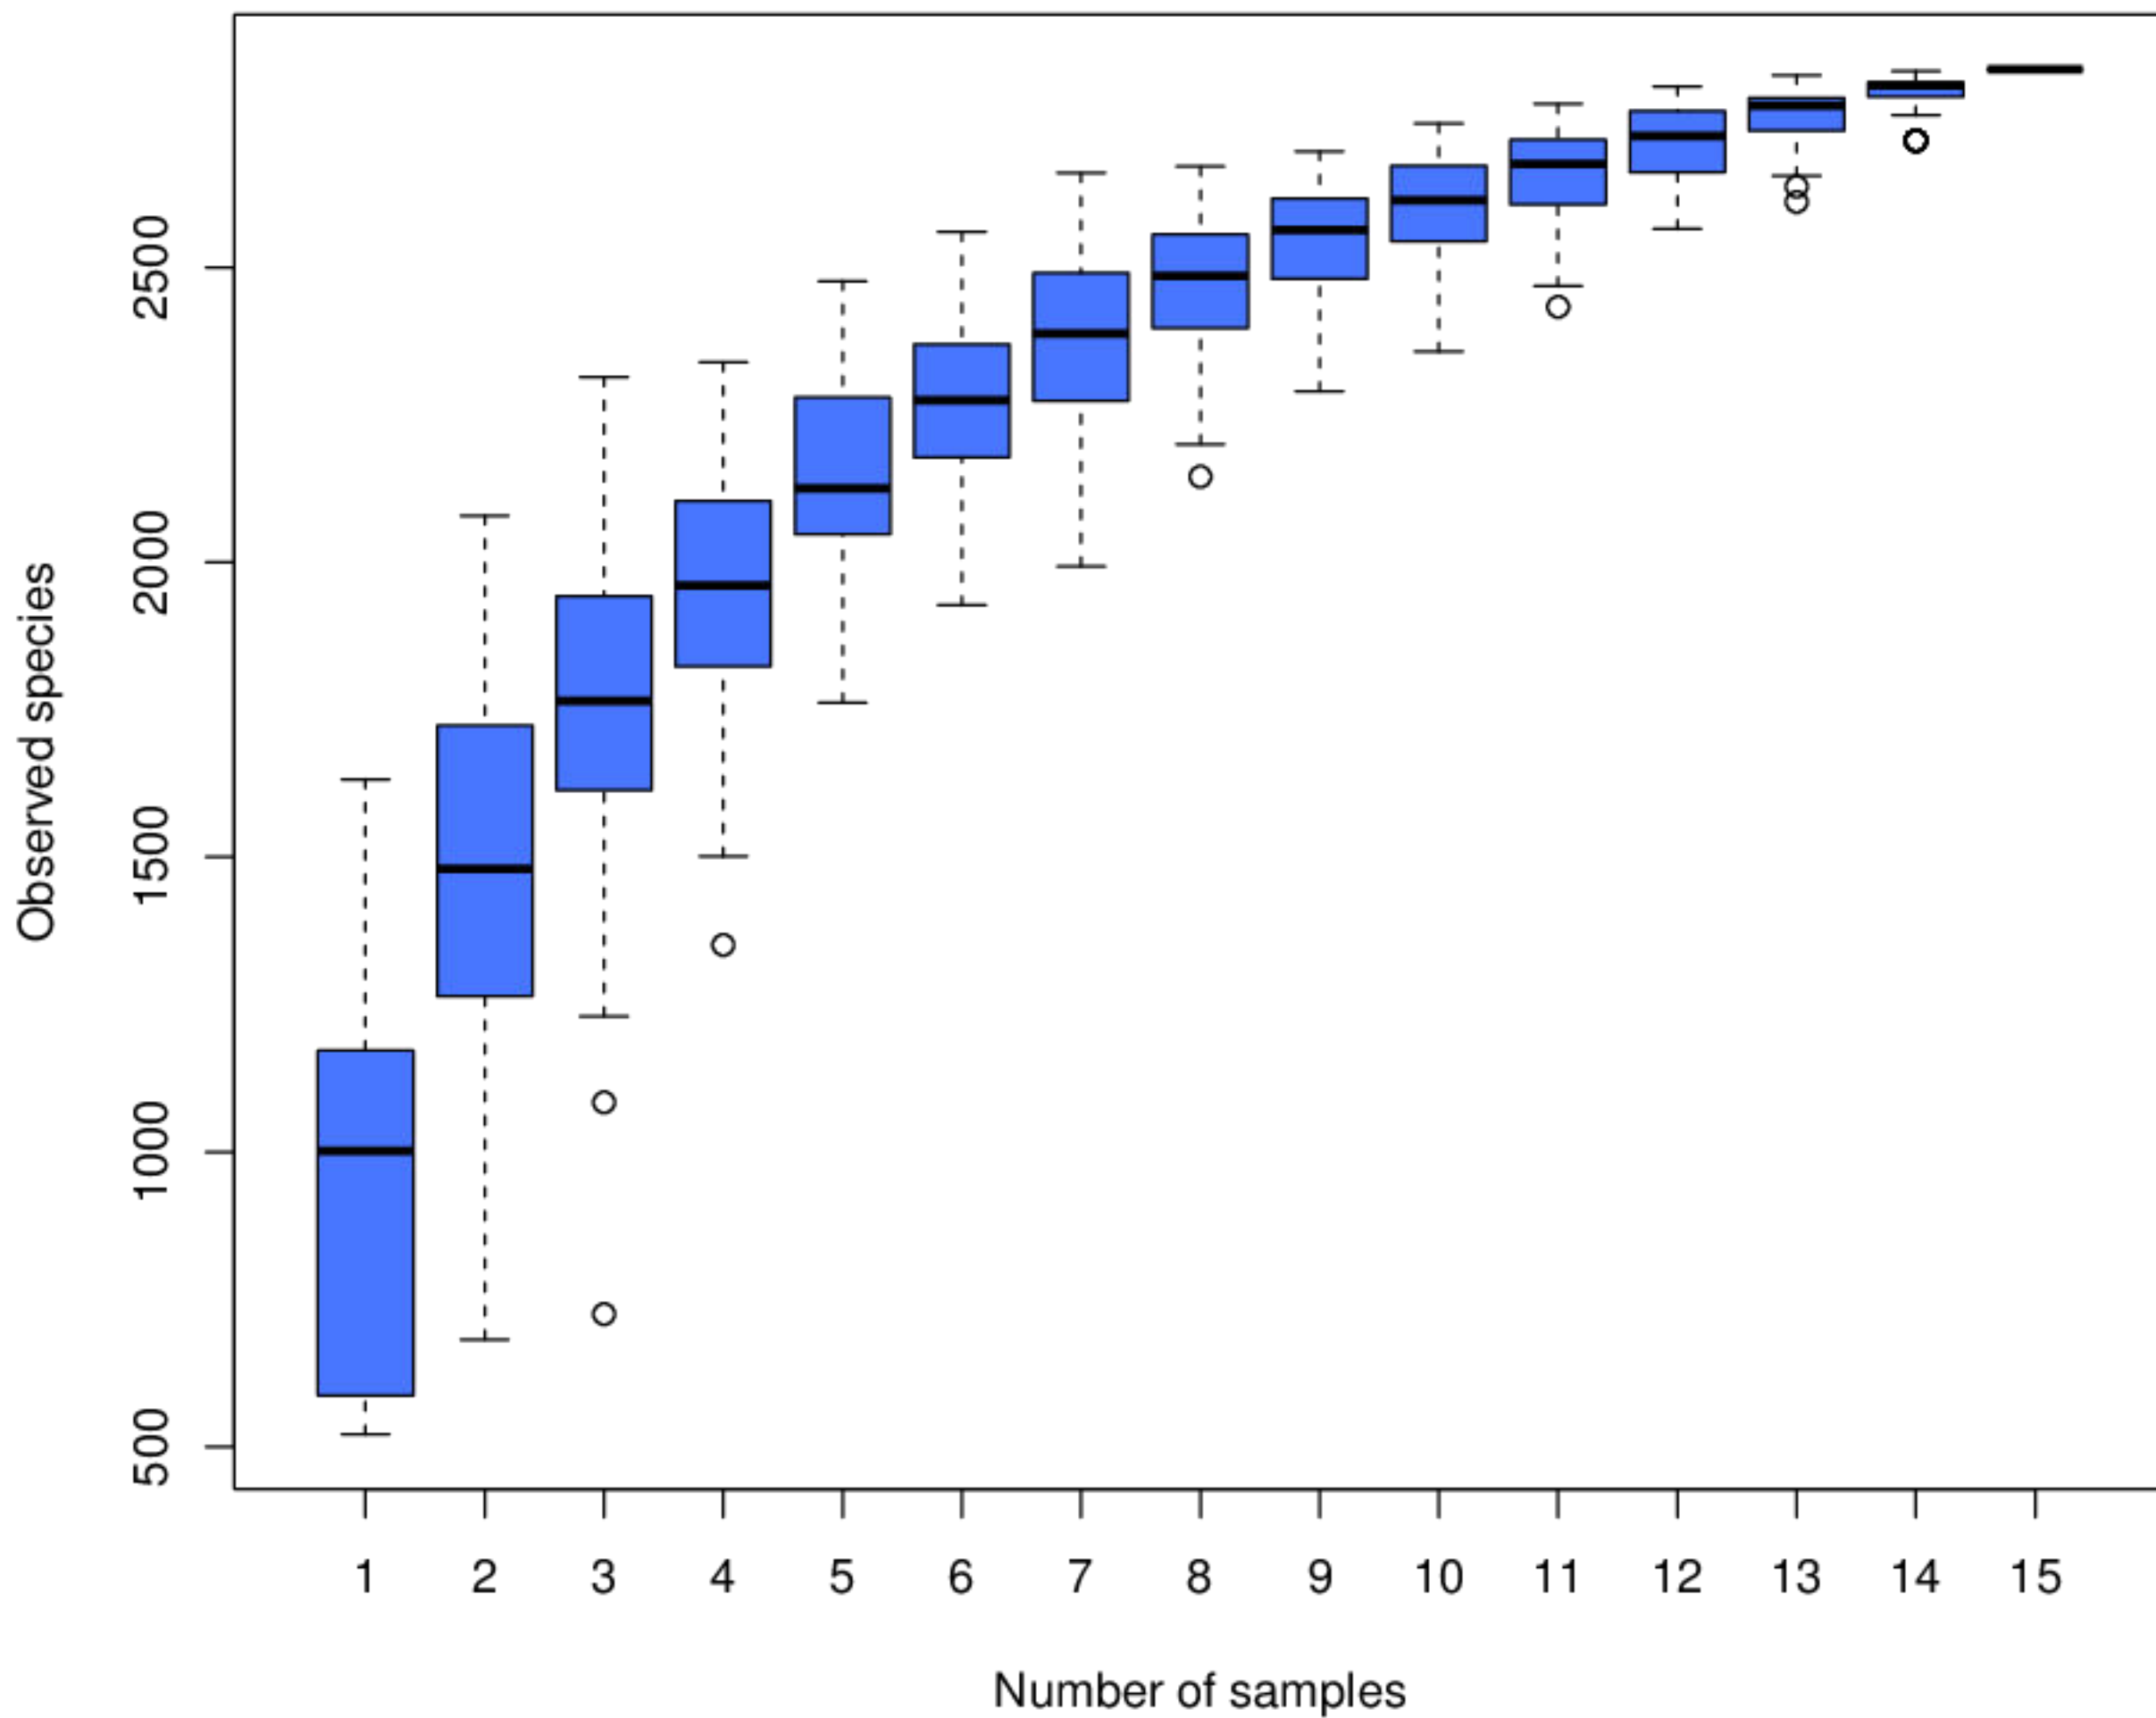

Supplement: c9fo02963j1.pdf [file c9fo02963j1.pdf]
